# Supplementary figures and images for: IPSC-Derived Astrocytes Contribute to In Vitro Modeling of Parkinson’s Disease Caused by the GBA1 N370S Mutation
Source: MDPI journal article supplement (doi:10.3390/ijms25010327), 2023-12-26

## Supplementary Materials

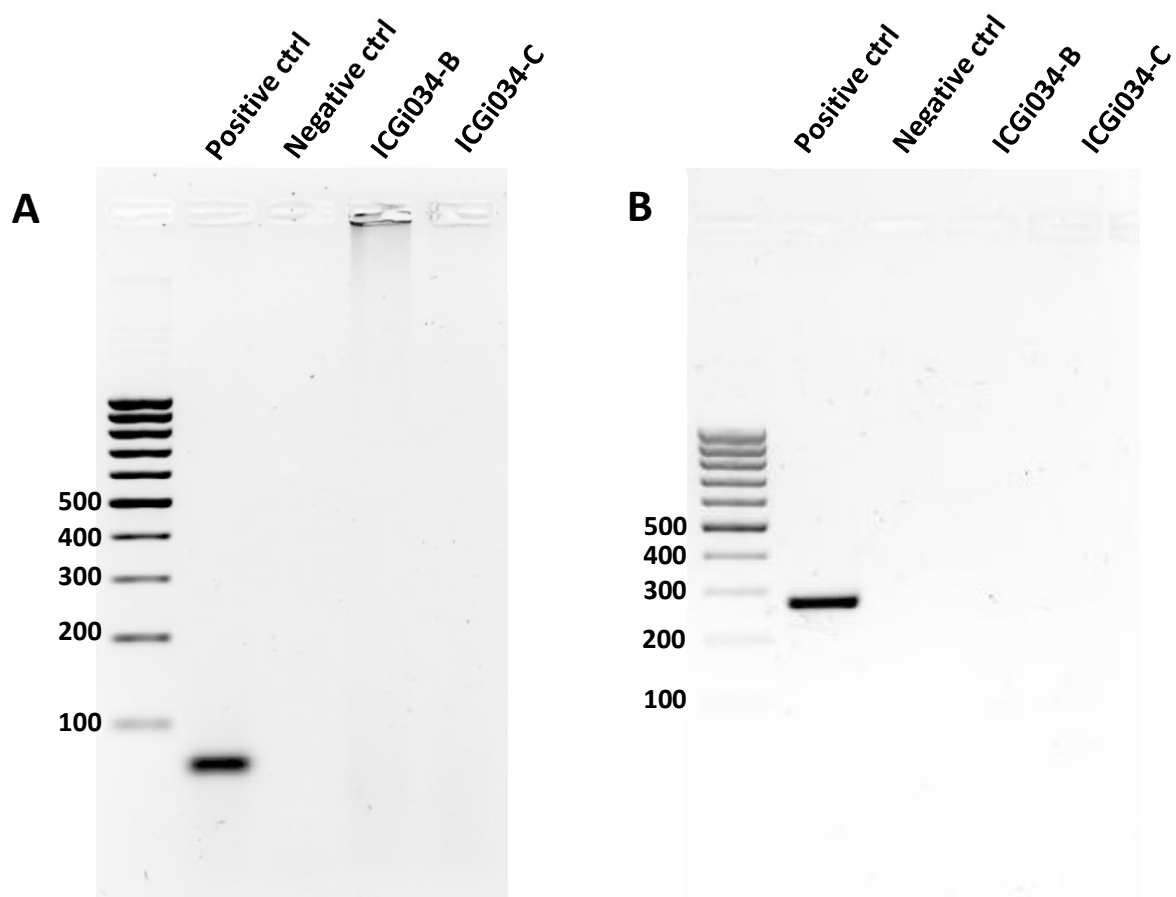

**Figure S1.** Episomes (A) and mycoplasma (B) detection.

Supplement: s1 [file s1]
